# Supplementary material for: Synthesis of thiolated Ag/Au bimetallic nanoclusters exhibiting an anti-galvanic reduction mechanism and composition-dependent fluorescence
Source: Royal Society of Chemistry journal article supplement (doi:10.1039/c4nr00445k), 2014-01-01
Supplement: c4nr00445k1.pdf [file c4nr00445k1.pdf]

Electronic Supplementary Information (ESI)

**Synthesis of thiolated Ag/Au bimetallic nanoclusters exhibiting anti-galvanic reduction mechanism and composition-dependent fluorescence**

Jian Sun,<sup>a</sup> Haoxi Wu,<sup>a,b</sup> and Yongdong Jin<sup>\*a</sup>

*<sup>a</sup>State Key Laboratory of Electroanalytical Chemistry, Changchun Institute of Applied Chemistry, Chinese Academy of Sciences, Changchun 130022, Jilin, China. <sup>b</sup>University of the Chinese Academy of Sciences, Beijing 100039, China. Phone/fax: +86-431-85262661. E-mail: [ydjin@ciac.ac.cn](mailto:ydjin@ciac.ac.cn)*

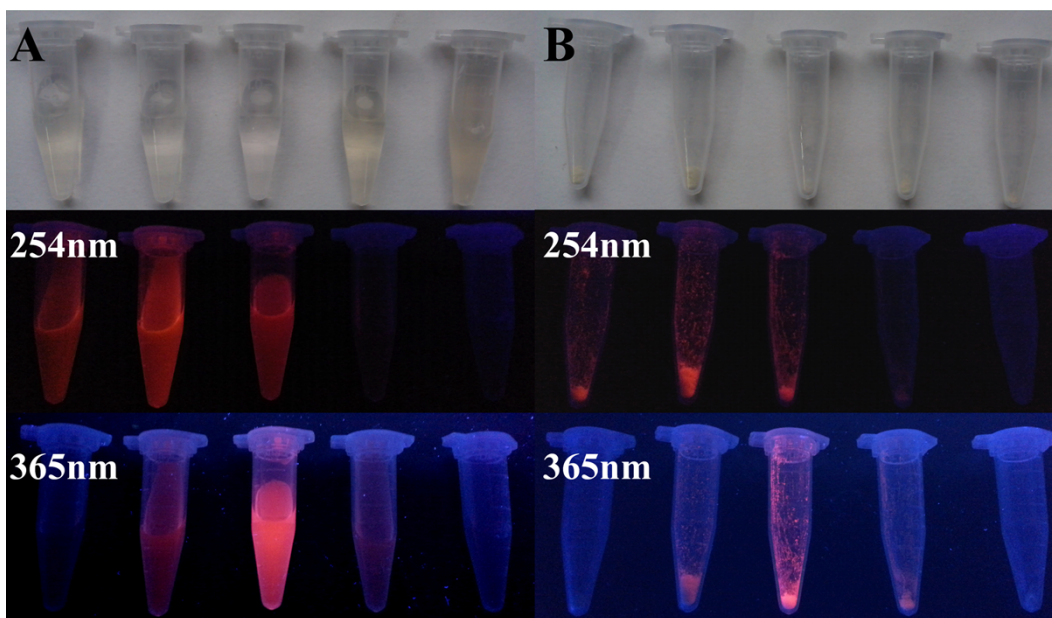

**Figure S1.** The photographs of the 11-MUA-Ag/Au NCs (Ag-to-Au molar ratios of 0:1, 1:8, 1:2, 1:1 and 1:0 from left to right) in aqueous solution (A) or the freeze-dried powder (B) under irradiation of visible (top), 254 nm (middle) and 365 nm UV light (bottom), respectively.

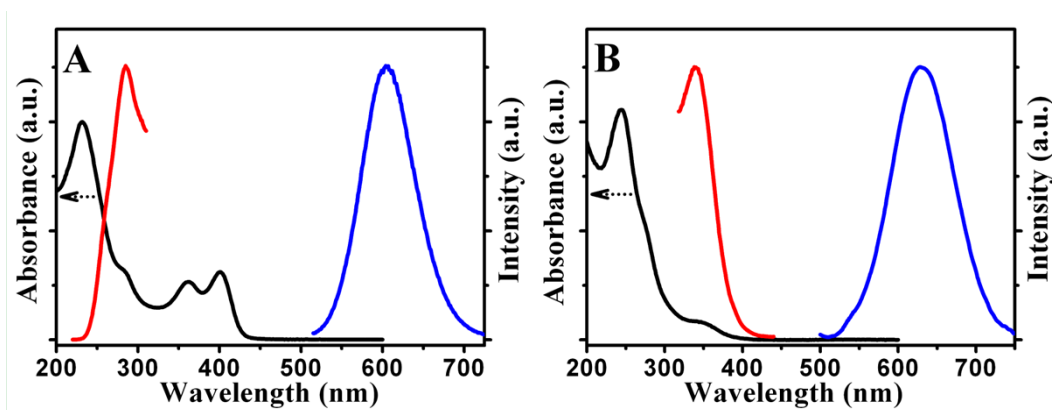

**Figure S2.** UV-vis absorption (black), fluorescence excitation (red) and emission (blue) spectra of the 11-MUA-AuNCs (A) and 11-MUA-Ag/Au NCs (1:2) (B).

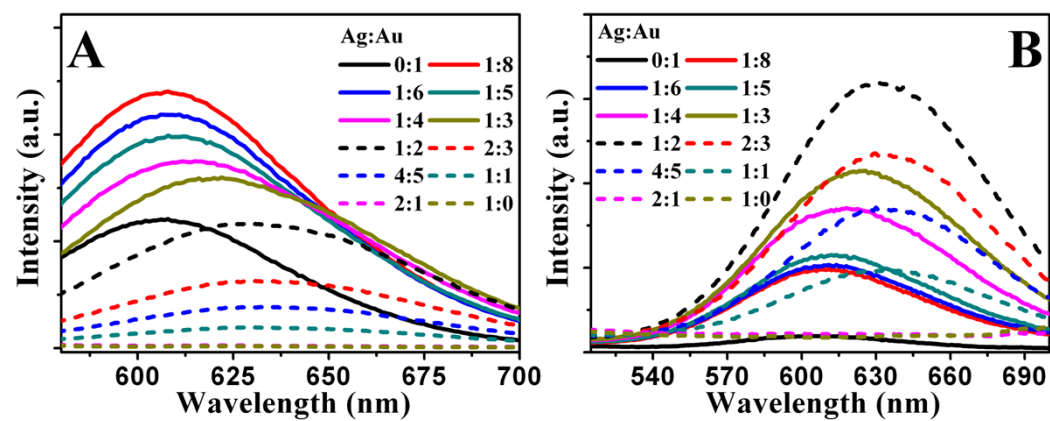

**Figure S3.** Fluorescence emission spectra of the 11-MUA-Ag/Au NCs at excitation of 280 nm (A) and excitation of 360 nm (B) prepared with different Ag-to-Au molar ratios at a constant total concentration of metal ions (0.75 mM).

**Table S1.** Fluorescence properties of the 11-MUA-Ag/Au NCs prepared at various concentration ratios of H<sub>2</sub>AuCl<sub>4</sub> to AgNO<sub>3</sub>

| AgNO <sub>3</sub> : H <sub>2</sub> AuCl <sub>4</sub> | excitation (nm) | emission (nm) | QYs (%) |
|------------------------------------------------------|-----------------|---------------|---------|
| 0:1                                                  | 285             | 605           | 2.38    |
| 1:8                                                  | 285             | 607           | 3.80    |
| 1:6                                                  | 290             | 608           | 3.15    |
| 1:5                                                  | 320             | 610           | 3.52    |
| 1:4                                                  | 322             | 612           | 4.09    |
| 1:3                                                  | 327             | 620           | 4.96    |
| 1:2                                                  | 340             | 630           | 6.81    |
| 2:3                                                  | 345             | 632           | 4.88    |
| 4:5                                                  | 350             | 635           | 3.22    |
| 1:1                                                  | 355             | 635           | 1.18    |
| 2:1                                                  | ~355            | ~635          | 0.04    |
| 1:0                                                  | —               | —             | —       |

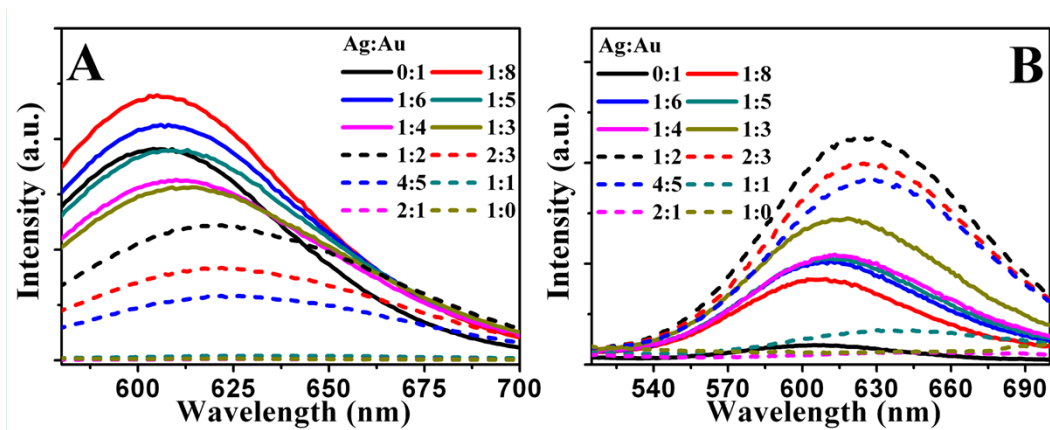

**Figure S4.** Fluorescence emission spectra at excitation of 280 nm (A) and excitation of 360 nm (B) of the 11-MUA-Ag/Au NCs prepared with constant final HAuCl<sub>4</sub> concentration (0.75 mM) and different Ag-to-Au molar ratios by changing the added volume of AgNO<sub>3</sub> stock solution.

**Table S2.** ICP-OES data and the Ag-to-Au molar ratios of 11-MUA-Ag/Au NCs calculated from the ICP-OES, EDX and XPS data, respectively.

| AgNO <sub>3</sub> : HAuCl <sub>4</sub> | ICP-OES data |          |        | Ag: Au<br>calculated from EDX | Ag: Au<br>calculated from XPS |
|----------------------------------------|--------------|----------|--------|-------------------------------|-------------------------------|
|                                        | Ag (ppm)     | Au (ppm) | Ag: Au |                               |                               |
| 0: 1                                   | —            | 193600   | 0: 1   | 0: 1                          | 0: 1                          |
| 1: 8                                   | 11290        | 181500   | 1: 16  | 1: 30                         | 1: 5.4                        |
| 1: 2                                   | 39660        | 151400   | 1: 3.8 | 1: 2.7                        | 1: 1.2                        |
| 1: 1                                   | 60320        | 106500   | 1: 1.8 | 1: 0.43                       | 1: 0.8                        |
| 1: 0                                   | 18870        | —        | 1: 0   | 1: 0                          | 1: 0                          |

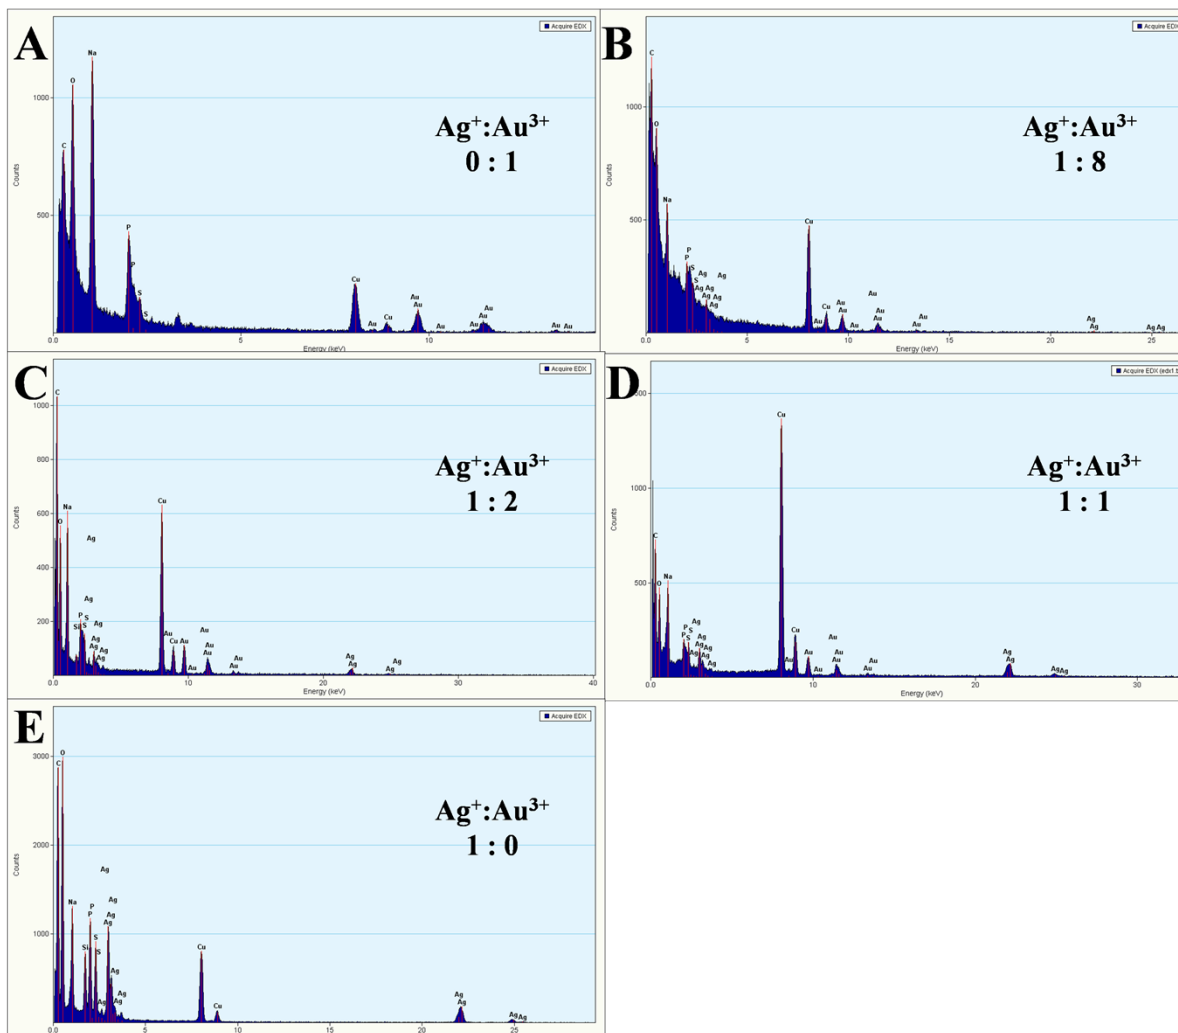

**Figure S5.** EDX spectra collected for the 11-MUA-Ag/Au NCs prepared at Ag-to-Au molar ratios of (A) 0:1, (B) 1:8, (C) 1:2, (D) 1:1, and (E) 1:0, respectively.

**Table S3.** The total metal (Ag/Au)-to-S molar ratios of 11-MUA-Ag/Au NCs calculated from the ICP-OES and XPS data, respectively.

| AgNO <sub>3</sub> : HAuCl <sub>4</sub> | Ag/Au: S<br>calculated from ICP-OES | Ag/Au: S<br>calculated from XPS |
|----------------------------------------|-------------------------------------|---------------------------------|
| 0: 1                                   | 1: 0.17                             | 1: 1.2                          |
| 1: 8                                   | 1: 0.17                             | 1: 0.92                         |
| 1: 2                                   | 1: 0.21                             | 1: 1.3                          |
| 1: 1                                   | 1: 0.26                             | 1: 1.2                          |
| 1: 0                                   | 1: 1.6                              | 1: 1.2                          |

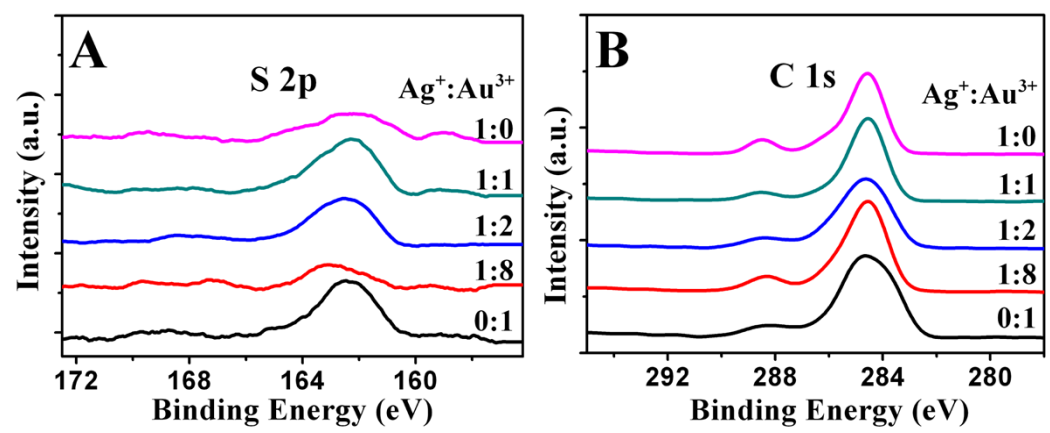

**Figure S6.** XPS spectra of S 2p (A) and C 1s (B) for the 11-MUA-Ag/Au NCs prepared at Ag-to-Au molar ratios of 0:1, 1:8, 1:2, 1:1, and 1:0, respectively.

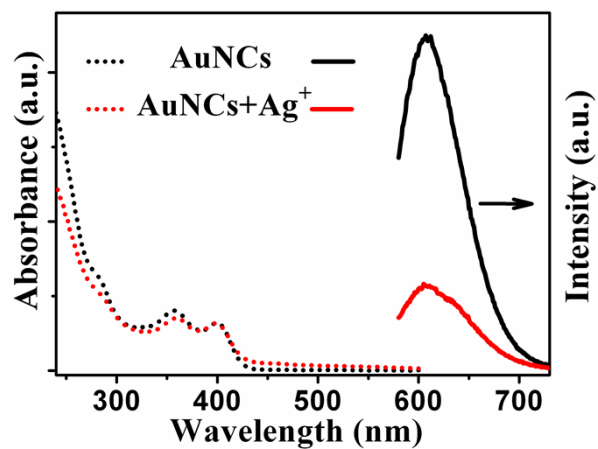

**Figure S7.** (A) UV-vis absorption (dotted lines) and fluorescence emission (solid lines) spectra of the as-obtained purified 11-MUA-AuNCs before (black) and after (red) adding Ag<sup>+</sup> ions.

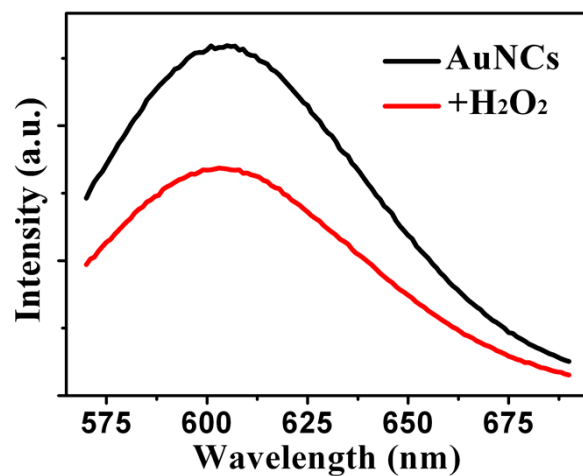

**Figure S8.** Fluorescence emission spectra (excitation at 280 nm) of the as-obtained purified AuNCs before (black lines) and after (red lines) adding H<sub>2</sub>O<sub>2</sub>.

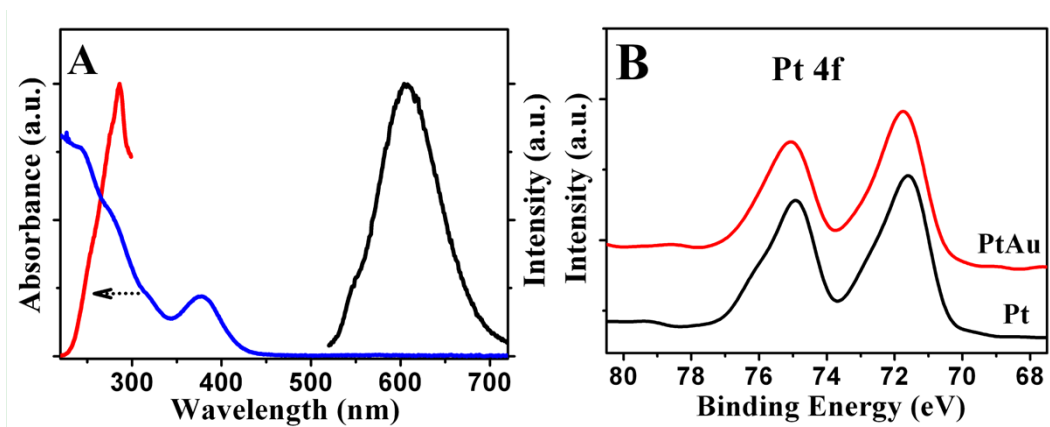

**Figure S9.** (A) UV-vis absorption (blue), fluorescence excitation (red) and emission (black) spectra of the 11-MUA-Pt/Au NCs prepared at Pt-to-Au molar ratios of 1:2. (B) XPS spectra of Pt 4f for the 11-MUA-Pt (black) and 11-MUA-Pt/Au (1:2) NCs (red).

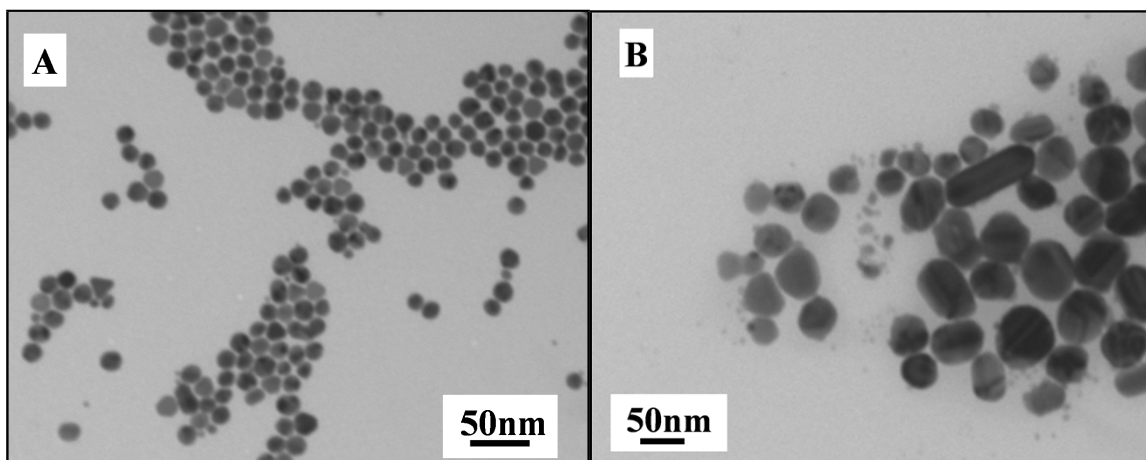

**Figure S10.** Typical TEM images of the control 11-MUA-AuNPs (A) and 11-MUA-AgNPs (B) prepared through the citrate-mediated reduction and ligand exchange method.



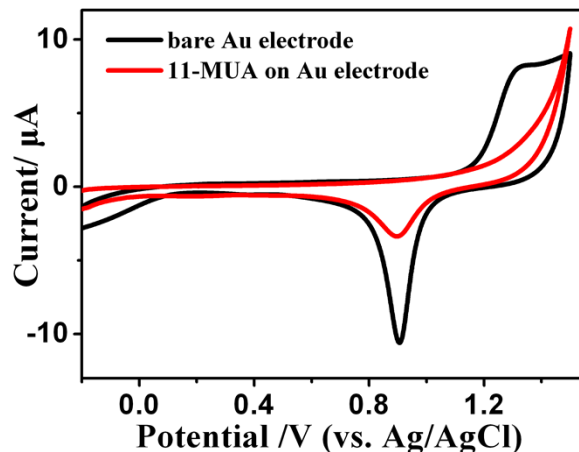

**Figure S11.** Cyclic voltammograms of the bare bulk Au electrode before (black) and after (red) self-assembling of 11-MUA monolayer, respectively, in 0.5 M  $\text{H}_2\text{SO}_4$  solution. Note that after surface passivation by 11-MUA monolayer, the oxidation peak around 1.35 V disappeared, but the onset oxidation potential ( $\sim 1.1$  V) is quite similar to that of the bare bulk Au electrode.

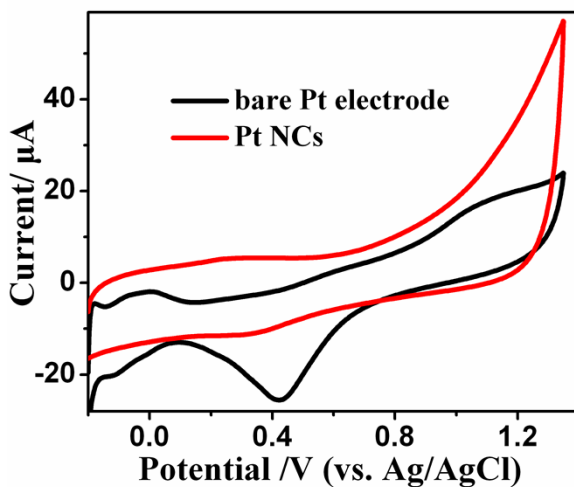

**Figure S12.** Cyclic voltammograms of the bare bulk Pt electrode (black) and 11-MUA-Pt NCs (red), respectively, in 0.5 M  $\text{H}_2\text{SO}_4$  solution on the glassy carbon electrode.

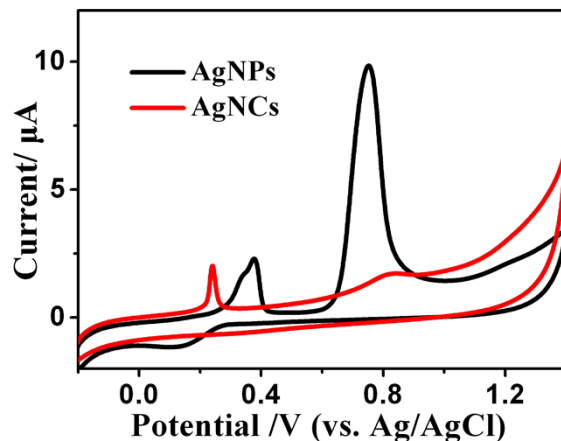

**Figure S13.** Cyclic voltammograms of the 11-MUA-AgNPs (~ 40–60 nm) and 11-MUA-AgNCs (~ 2.4 nm), respectively, in 0.5 M H<sub>2</sub>SO<sub>4</sub> solution on the glassy carbon electrode. Note that the potentials of the oxidation peak of the 11-MUA-AgNPs and 11-MUA-AgNCs increased from ~ 0.75 V to 0.85 V with shrinkage in size.

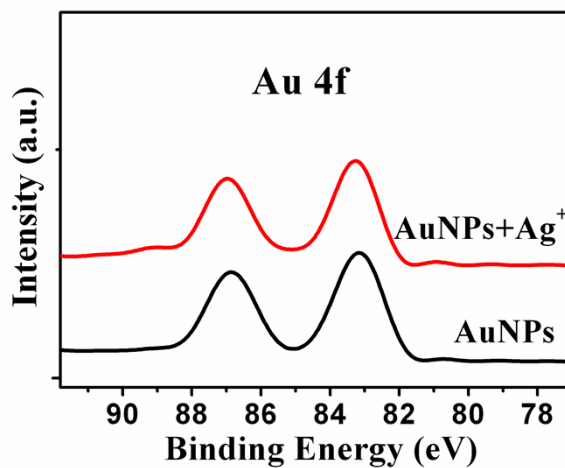

**Figure S14.** (A) XPS spectra of Au 4f for the as-obtained purified 11-MUA-AuNPs (~15–20 nm in diameter) before (black) and after (red) adding Ag<sup>+</sup> ions.
